# Supplementary material for: Polypyrrole-functionalized ruthenium carbene catalysts as efficient heterogeneous systems for olefin epoxidation
Source: Royal Society of Chemistry journal article supplement (doi:10.1039/c4dt00698d), 2014-01-01

Supplementary information to be published electronically for the paper:

## Polypyrrole-Functionalized Ruthenium Carbene Catalysts as Efficient Heterogeneous Systems for Olefin Epoxidation.

Mohamed Dakkach,<sup>a,b</sup> Xavier Fontrodona,<sup>a</sup> Teodor Parella,<sup>c</sup> Ahmed Atlamsani,<sup>b</sup> Isabel Romero,<sup>a,\*</sup> Montserrat Rodríguez<sup>a,\*</sup>

<sup>a</sup> Departament de Química i Serveis Tècnics de Recerca, Universitat de Girona, Campus de Montilivi, E-17071 Girona, Spain. *E-mail:* montse.rodriguez@udg.edu, marisa.romero@udg.edu.

<sup>b</sup> Laboratoire des Matériaux et Systèmes Interfaciaux, Département de Chimie, Faculté des Sciences, B.P.: 2121 93000 Tétouan, Morocco.

<sup>c</sup> Departament de Química i Servei de RMN Universitat Autònoma de Barcelona, Cerdanyola del Vallès, E-08193 Barcelona, Spain.

### CONTENTS.

**Table S 1.** Crystal data for the X-ray structures of complexes **2a** and **2b**.

**Table S 2.** Main bond lengths (Å) and angles (°) for the X-ray structure of complexes **2a** and **2b**.

**Figure S 1.** Possible diastereoisomers for complex  $[\text{Ru}^{\text{II}}\text{Cl}(\text{CN-Me})(\text{bpea-pyr})]^+$ , **3**.

**Figure S 2.** NMR spectra (600 MHz, 298 K,  $d_6$ -acetone) of complex *trans,mer*- $[\text{Ru}^{\text{II}}\text{Cl}_2(\text{bpea-pyr})(\text{dmsO})]$ , **2a**: (a) <sup>1</sup>H-NMR, (b) <sup>13</sup>C-NMR, (c) COSY, (d) NOESY, (e) HSQC, (f) HMBC.

**Figure S 3.** NMR spectra (600 MHz, 298 K,  $d_6$ -acetone) of complex *cis,fac*- $[\text{Ru}^{\text{II}}\text{Cl}_2(\text{bpea-pyr})(\text{dmsO})]$ , **2b**: (a) <sup>1</sup>H-NMR, (b) <sup>13</sup>C-NMR, (c) COSY, (d) NOESY, (e) HSQC, (f) HMBC.

**Figure S 4.** NMR spectra (600 MHz, 298 K,  $d_6$ -acetone) *trans,fac*- $[\text{Ru}^{\text{II}}\text{Cl}(\text{CN-Me})(\text{bpea-pyr})]^+$ , **3**: (a) <sup>1</sup>H-NMR, (b) <sup>13</sup>C-NMR, (c) COSY, (d) NOESY, (e) HSQC, (f) HMBC.

**Figure S 5.** NMR spectra (600 MHz, 298 K,  $d_6$ -acetone) *trans,fac*- $[\text{Ru}^{\text{II}}(\text{CN-Me})(\text{bpea-pyr})(\text{H}_2\text{O})]^{2+}$ , **4**: (a) <sup>1</sup>H-NMR, (b) <sup>13</sup>C-NMR, (c) COSY, (d) NOESY, (e) HSQC, (f) HMBC.

**Figure S 6.** Cyclic voltammogram of complex **3** (1 mM) registered in  $\text{CH}_2\text{Cl}_2$  + 0.1 M TBAH at a glassy carbon disk electrode (scan rate = 100 mV s<sup>-1</sup>).

**Figure S 7.** Cyclic voltammogram of complex **4** (1 mM) in  $\text{CH}_2\text{Cl}_2$  + 0.1 M TBAH at a glassy carbon disk electrode (scan rate = 100 mV s<sup>-1</sup>).

**Figure S 8.** (a) Growing of a **C/poly-3** film in  $\text{CH}_2\text{Cl}_2$  + 0.1 M TBAH at a glassy carbon disk electrode (diameter = 3 mm) by scanning the potential between 0 and 1.3 V throughout 30 cycles (scan rate = 100 mV s<sup>-1</sup>). (b) Cyclic voltammograms registered after transferring the **C/poly-3** modified electrode into a blank electrolyte solution (5 cycles were registered; final amount of anchored complex =  $4.36 \cdot 10^{-10}$  mols·cm<sup>-2</sup>).

**Figure S 9.** Linear regression of  $E_{1/2}$  values vs. pH for the cyclic voltammograms of complex **4** registered in aqueous media.

Table S 1. Crystal data for the X-ray structures of complexes **2a** and **2b**.

|                                          | Complex <b>2a</b>                                                   | Complex <b>2b</b>                                                   |
|------------------------------------------|---------------------------------------------------------------------|---------------------------------------------------------------------|
| Chemical formula                         | C <sub>21</sub> H <sub>28</sub> Cl <sub>2</sub> N <sub>4</sub> OSRu | C <sub>21</sub> H <sub>28</sub> Cl <sub>2</sub> N <sub>4</sub> OSRu |
| Molecular weight                         | 556.50                                                              | 556.50                                                              |
| Crystal system                           | Monoclinic                                                          | Triclinic                                                           |
| Space group                              | P21/c                                                               | P-1                                                                 |
| a[Å]                                     | 11.0431(5)                                                          | 9.495(6)                                                            |
| b[Å]                                     | 12.1413(6)                                                          | 15.469(10)                                                          |
| c[Å]                                     | 17.3390(8)                                                          | 16.457(10)                                                          |
| α[°]                                     | 90.00                                                               | 102.506(9)                                                          |
| β[°]                                     | 92.3280(10)                                                         | 90.074(9)                                                           |
| γ[°]                                     | 90.00                                                               | 94.764(10)                                                          |
| V [Å <sup>3</sup> ]                      | 2322.85(19)                                                         | 2351(3)                                                             |
| Z                                        | 4                                                                   | 4                                                                   |
| Temperature, K                           | 300(2)                                                              | 300(2)                                                              |
| ρ <sub>calc</sub> , [Mg/m <sup>3</sup> ] | 1.591                                                               | 1.572                                                               |
| μ[mm <sup>-1</sup> ]                     | 1.016                                                               | 1.003                                                               |
| R <sub>1</sub> <sup>a</sup> [I>2σ(I)]    | R <sub>1</sub> = 0.0257                                             | R <sub>1</sub> = 0.1806                                             |
| wR <sub>2</sub> <sup>b</sup> (all data)  | R <sub>1</sub> = 0.0294<br>= 0.0694                                 | R <sub>1</sub> = 0.2396<br>wR <sub>2</sub> = 0.4656                 |

$$^a R_1 = \sum ||F_o| - |F_c|| / \sum |F_o|$$

$$^b wR_2 = [\sum \{w(F_o^2 - F_c^2)^2\} / \sum \{w(F_o^2)^2\}]^{1/2}, \text{ where } w = 1/[\sigma^2(F_o^2) + (0.0042P)^2] \text{ and } P = (F_o^2 + 2F_c^2).$$

Table S 2. Main bond lengths (Å) and angles (°) for the X-ray structure of complexes **2a** and **2b**.

| Complex <b>2a</b> |             | Complex <b>2b</b> |           |
|-------------------|-------------|-------------------|-----------|
| Ru(1)-N(1)        | 2,0685(15)  | Ru(1)-N(3)        | 2,04(2)   |
| Ru(1)-N(3)        | 2,0859(14)  | Ru(1)-N(1)        | 2,097(16) |
| Ru(1)-N(2)        | 2,1656(14)  | Ru(1)-N(2)        | 2,162(15) |
| Ru(1)-S(1)        | 2,2321(4)   | Ru(1)-S(1)        | 2,227(6)  |
| Ru(1)-Cl(2)       | 2,3957(5)   | Ru(1)-Cl(1)       | 2,408(6)  |
| Ru(1)-Cl(1)       | 2,4550(4)   | Ru(1)-Cl(2)       | 2,439(6)  |
| N(1)-Ru(1)-N(3)   | 160,82(5)   | N(3)-Ru(1)-N(1)   | 82,9(7)   |
| N(1)-Ru(1)-N(2)   | 81,16(5)    | N(3)-Ru(1)-N(2)   | 82,6(7)   |
| N(3)-Ru(1)-N(2)   | 79,78(5)    | N(1)-Ru(1)-N(2)   | 82,1(6)   |
| N(1)-Ru(1)-S(1)   | 96,22(4)    | N(3)-Ru(1)-S(1)   | 91,3(6)   |
| N(3)-Ru(1)-S(1)   | 102,95(4)   | N(1)-Ru(1)-S(1)   | 173,9(4)  |
| N(2)-Ru(1)-S(1)   | 174,82(4)   | N(2)-Ru(1)-S(1)   | 99,0(4)   |
| N(1)-Ru(1)-Cl(2)  | 90,81(4)    | N(3)-Ru(1)-Cl(1)  | 172,6(6)  |
| N(3)-Ru(1)-Cl(2)  | 88,16(4)    | N(1)-Ru(1)-Cl(1)  | 91,9(4)   |
| N(2)-Ru(1)-Cl(2)  | 93,20(4)    | N(2)-Ru(1)-Cl(1)  | 91,6(4)   |
| S(1)-Ru(1)-Cl(2)  | 91,295(16)  | S(1)-Ru(1)-Cl(1)  | 94,1(2)   |
| N(1)-Ru(1)-Cl(1)  | 90,81(4)    | N(3)-Ru(1)-Cl(2)  | 96,2(6)   |
| N(3)-Ru(1)-Cl(1)  | 91,17(4)    | N(1)-Ru(1)-Cl(2)  | 90,8(4)   |
| N(2)-Ru(1)-Cl(1)  | 89,66(4)    | N(2)-Ru(1)-Cl(2)  | 172,9(4)  |
| S(1)-Ru(1)-Cl(1)  | 85,903(16)  | S(1)-Ru(1)-Cl(2)  | 88,0(2)   |
| Cl(2)-Ru(1)-Cl(1) | 176,900(16) | Cl(1)-Ru(1)-Cl(2) | 89,1(2)   |
| O(1)-S(1)-Ru(1)   | 117,59(6)   | O(1)-S(1)-Ru(1)   | 119,4(8)  |

Figure S 1. Possible diastereoisomers for complex  $[Ru^II Cl(CN-Me)(bpea-pyr)]^+$ , 3.

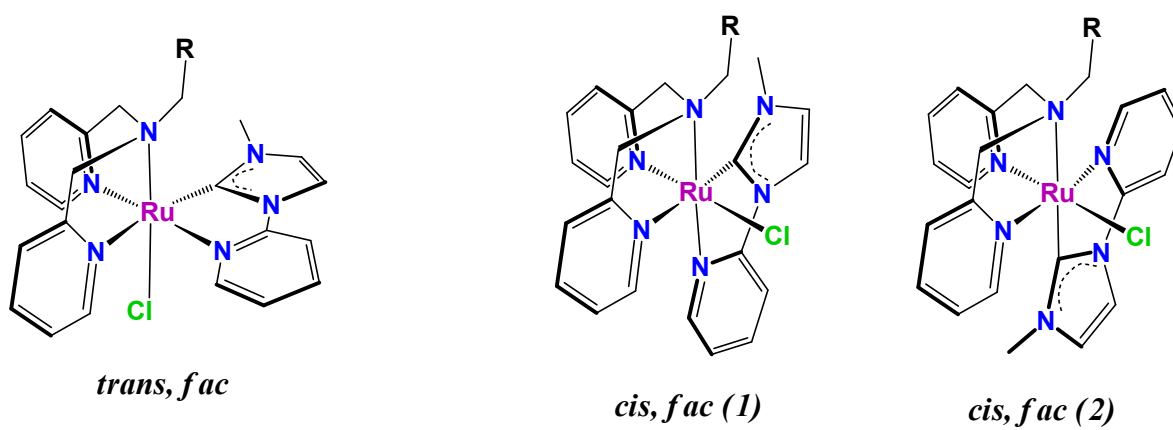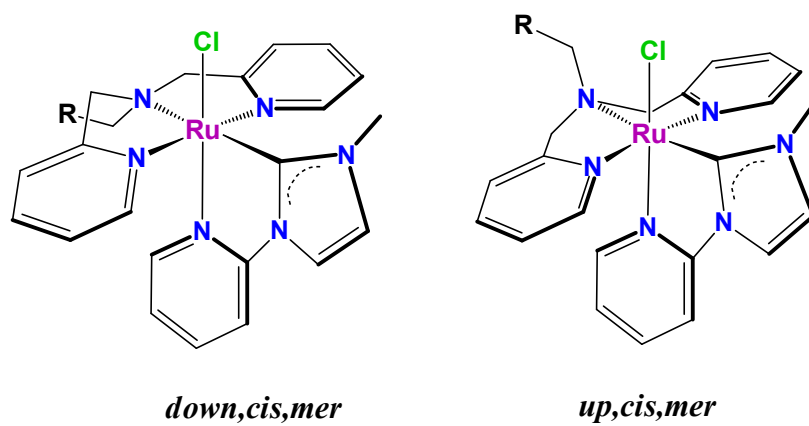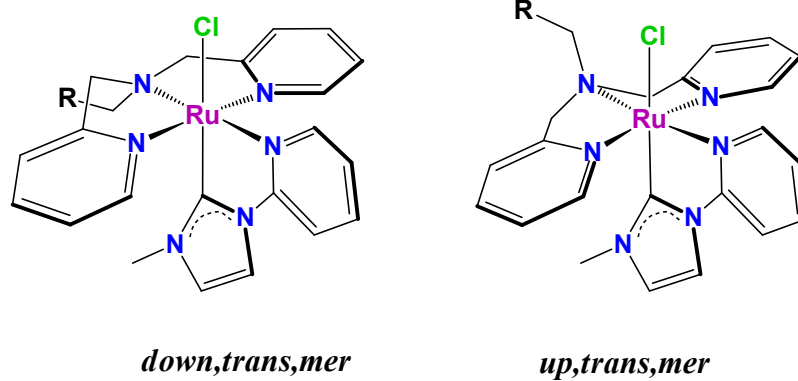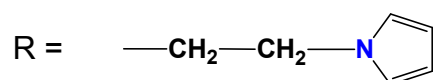

**Figure S 2.** NMR spectra (600 MHz, 298 K,  $d_6$ -acetone) of complex *trans,mer*-[Ru<sup>II</sup>Cl<sub>2</sub>(bpea-pyr)(dmsc)], **2a**: (a) <sup>1</sup>H-NMR, (b) <sup>13</sup>C-NMR, (c) COSY, (d) NOESY, (e) HSQC, (f) HMBC.

(a)

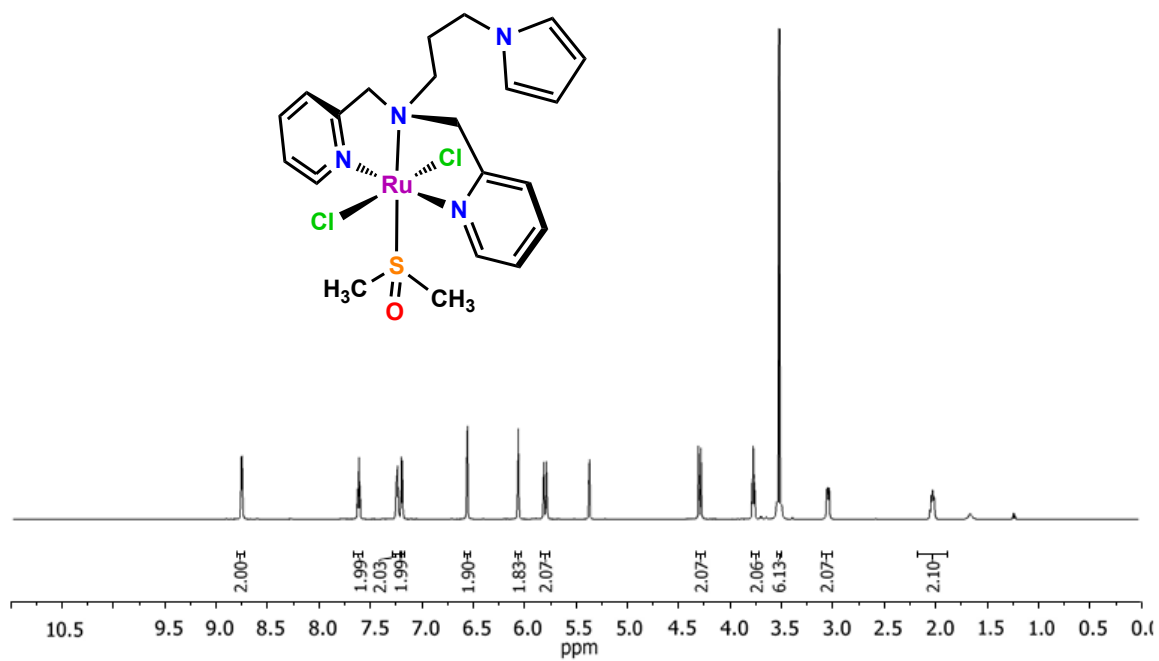

(b)

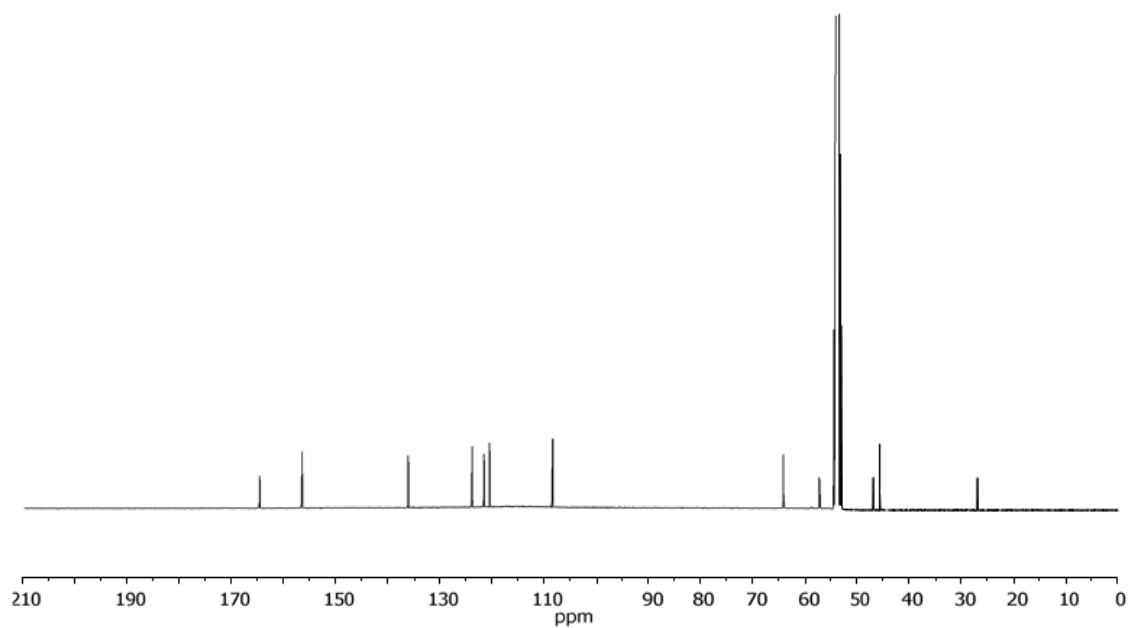

(c)

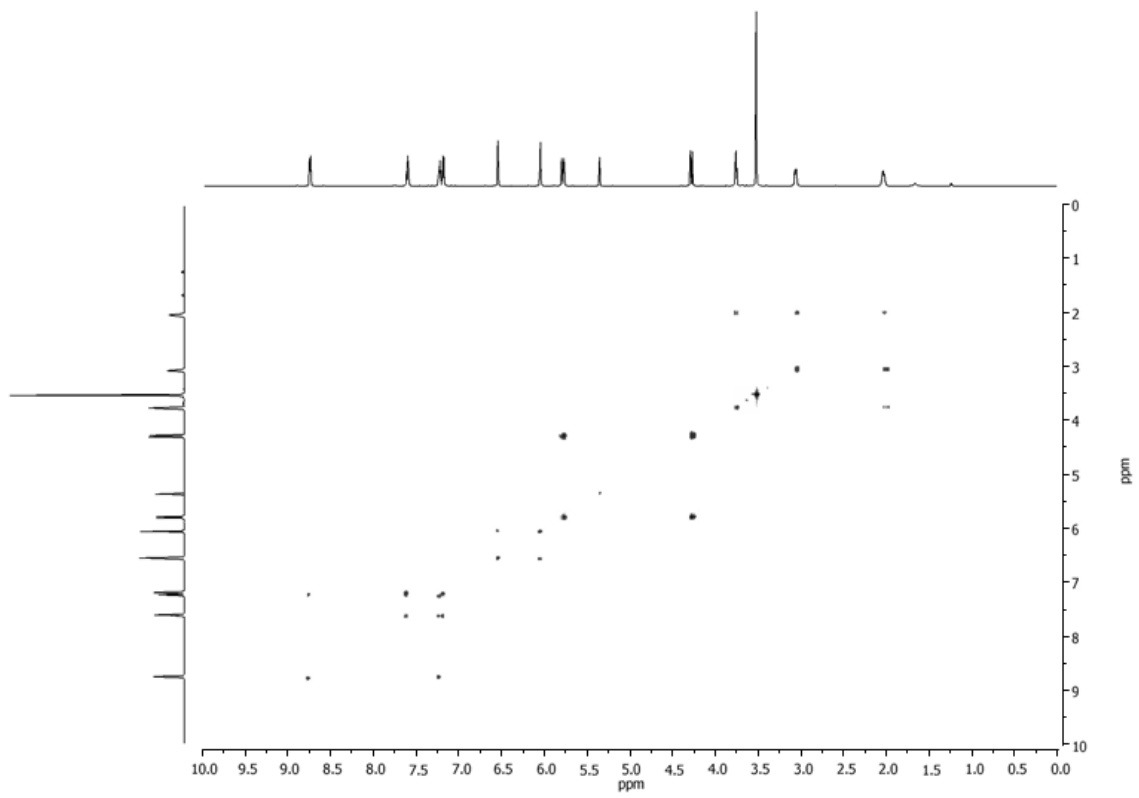

(d)

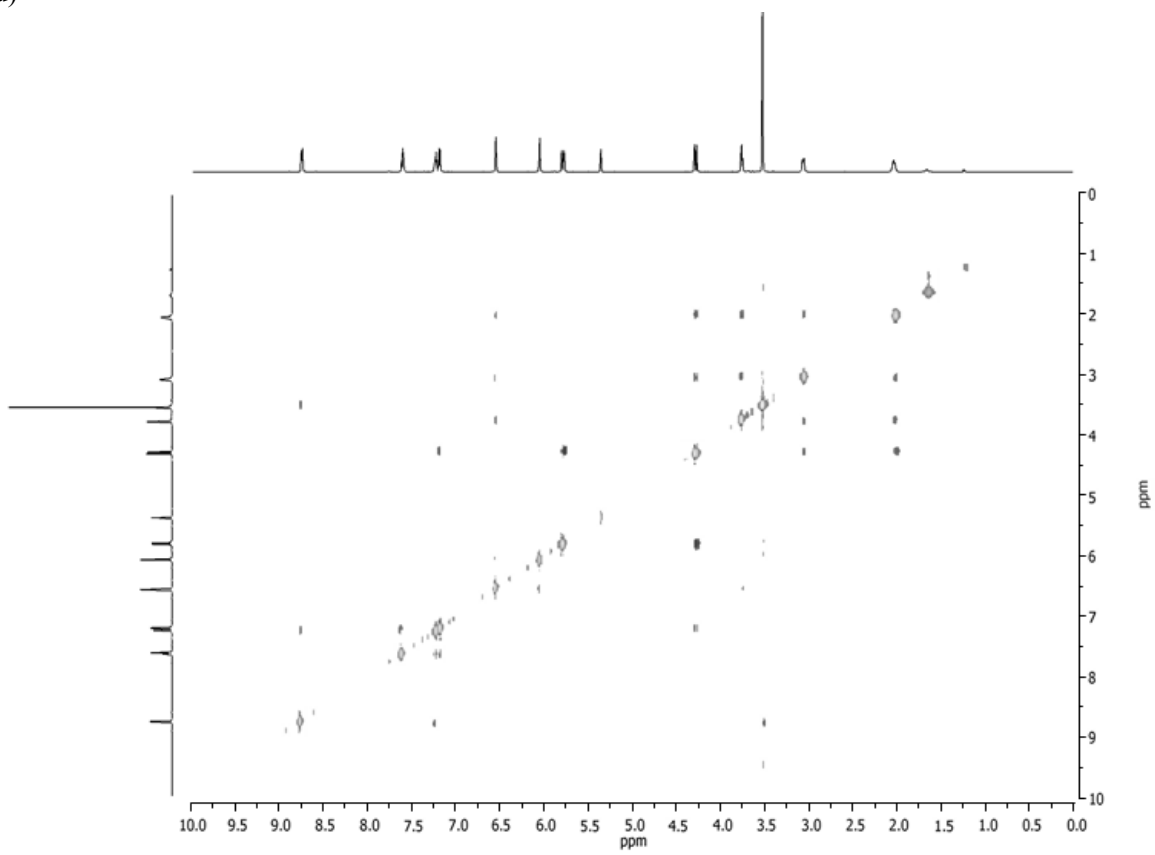

(e)

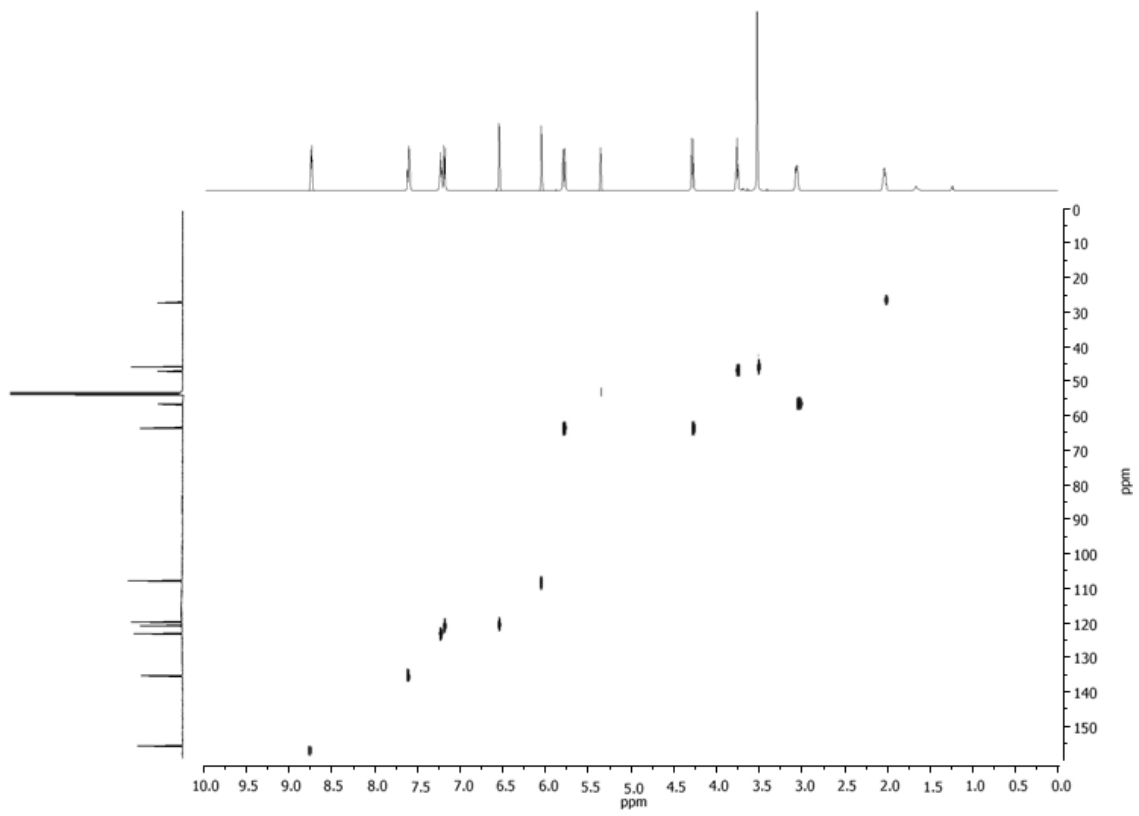

(f)

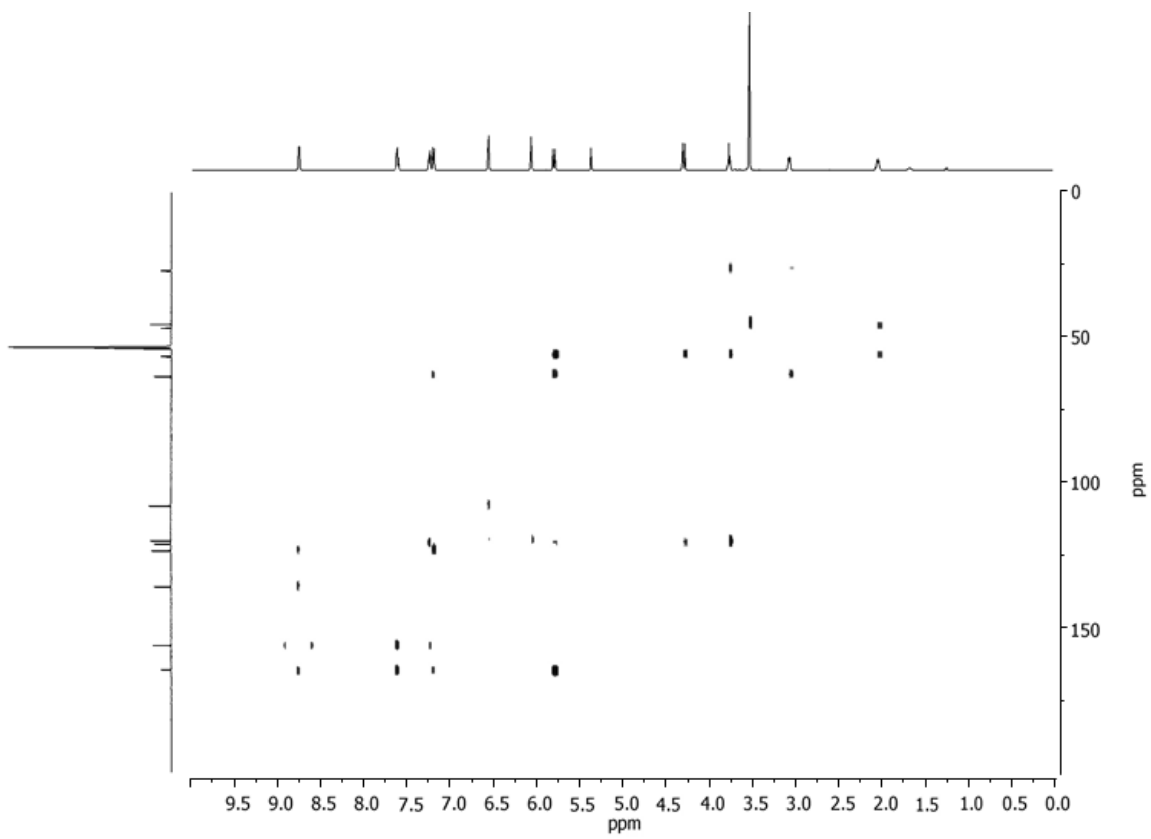

**Figure S 3.** NMR spectra (600 MHz, 298 K,  $d_6$ -acetone) of complex *cis,trans*-[Ru<sup>II</sup>Cl<sub>2</sub>(bpea-pyr)(dmsc)], **2b**: (a) <sup>1</sup>H-NMR, (b) <sup>13</sup>C-NMR, (c) COSY, (d) NOESY, (e) HSQC, (f) HMBC.

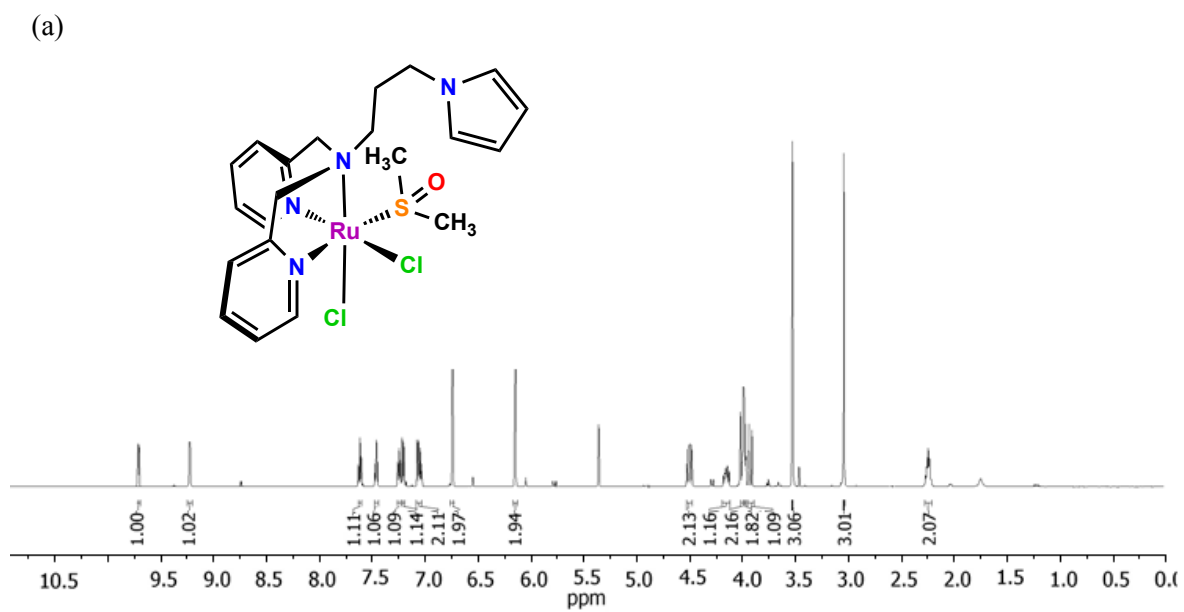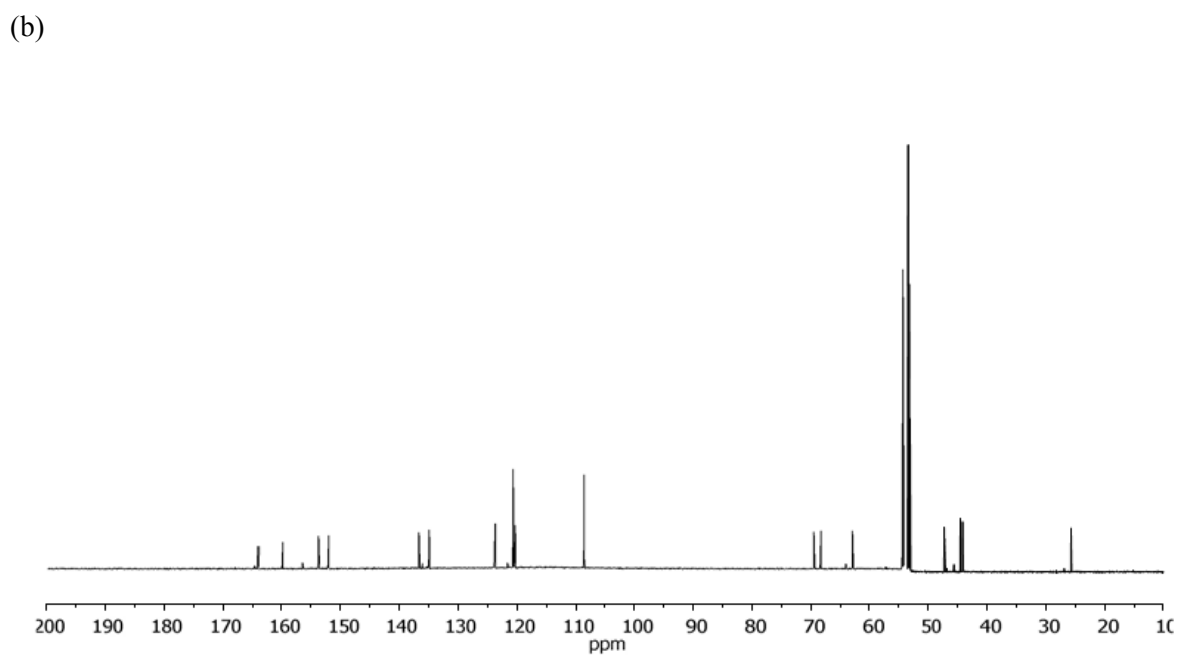

(c)

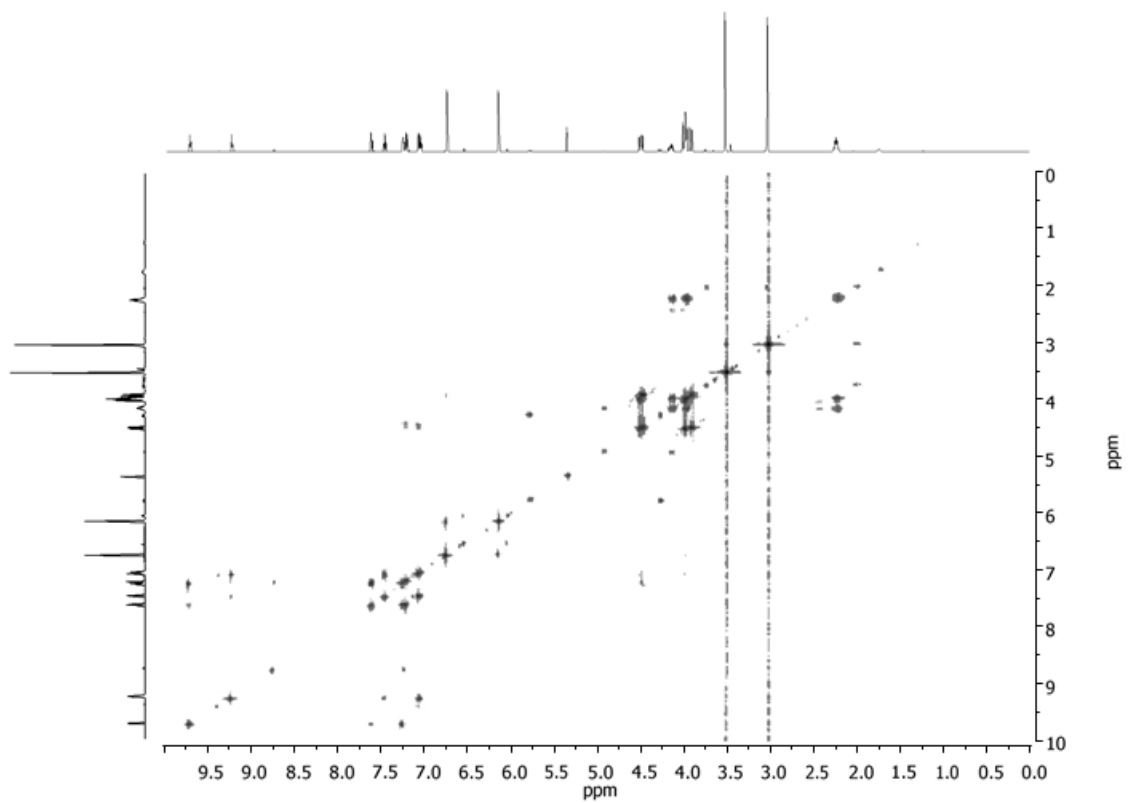

(d)

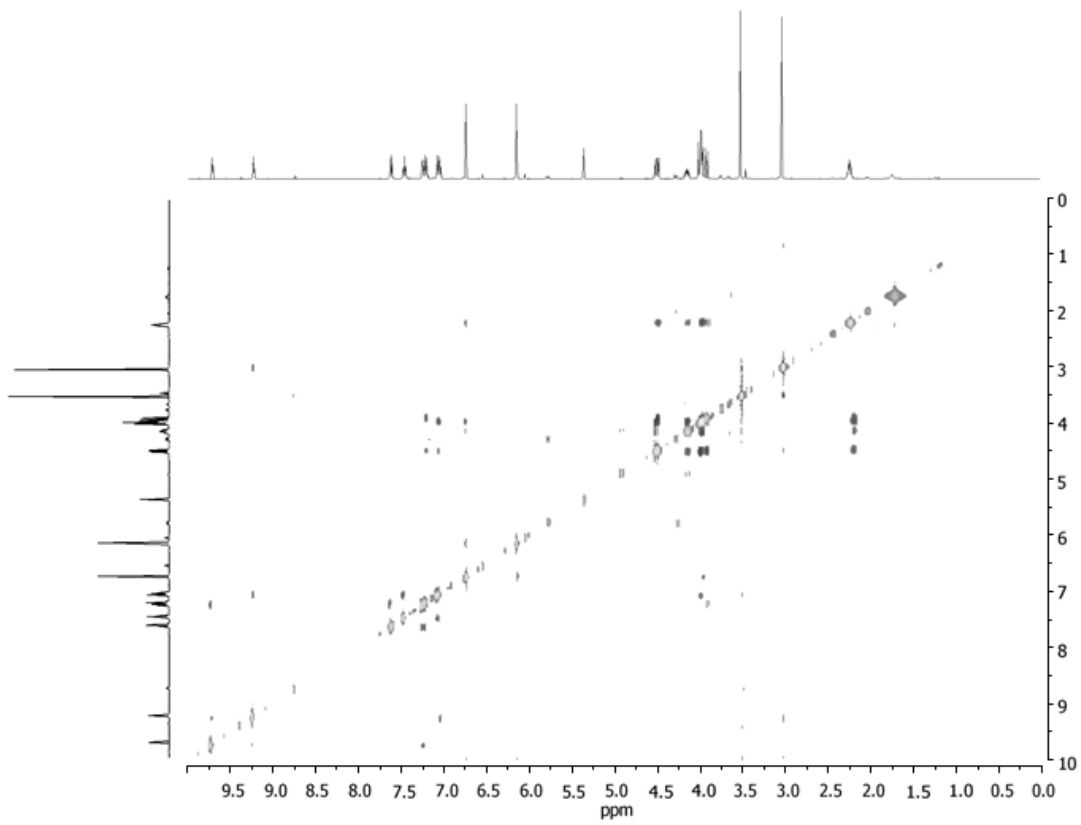



(e)

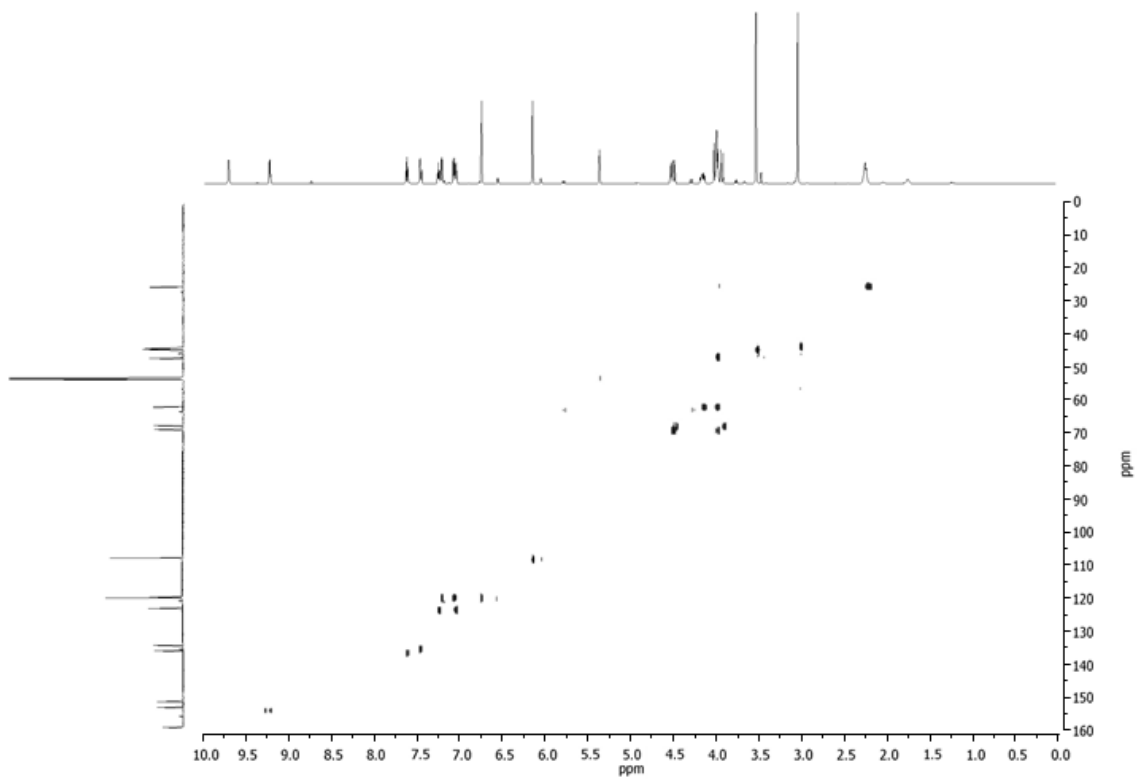

(f)

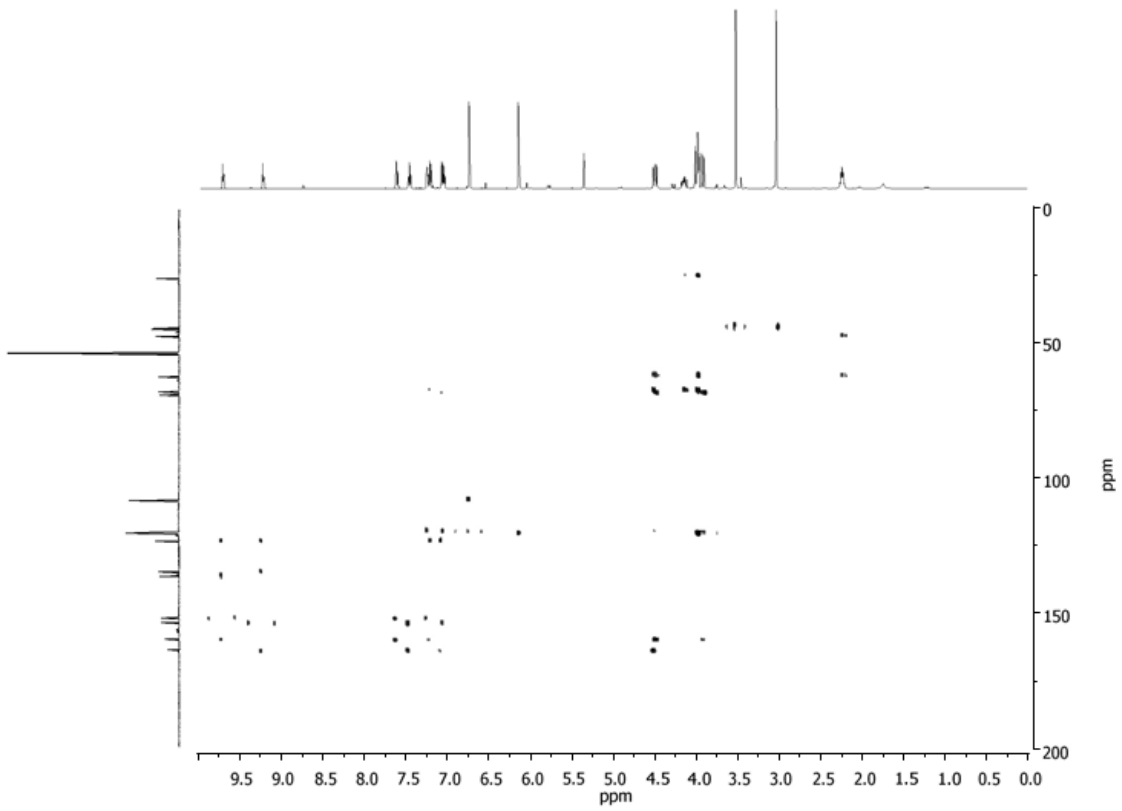

**Figure S 4.** NMR spectra (600 MHz, 298 K,  $d_6$ -acetone) *trans, fac*-[Ru<sup>II</sup>Cl(CN-Me)(bpea-pyr)]<sup>+</sup>, **3**: (a) <sup>1</sup>H-NMR, (b) <sup>13</sup>C-NMR, (c) COSY, (d) NOESY, (e) HSQC, (f) HMBC.

(a)

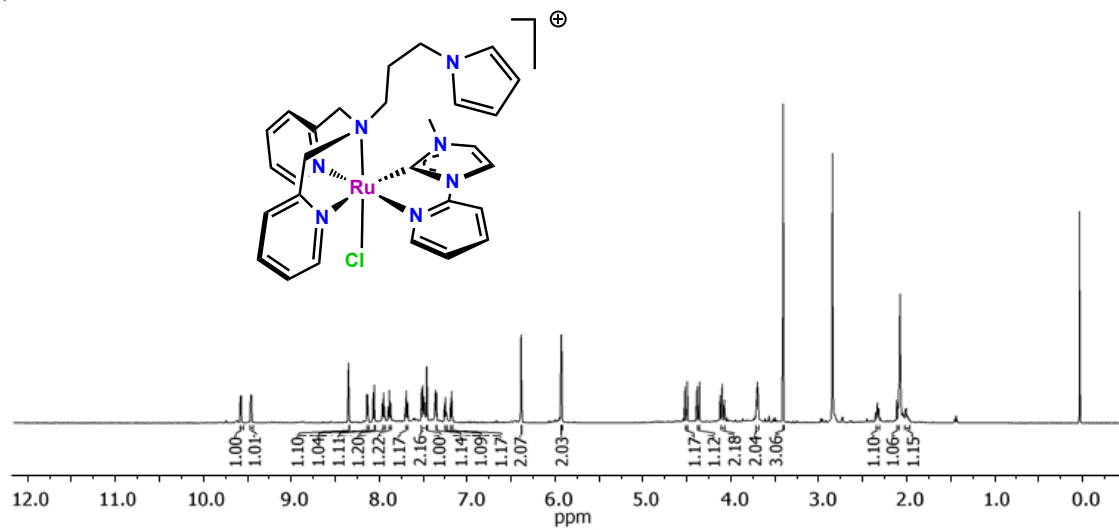

(b)

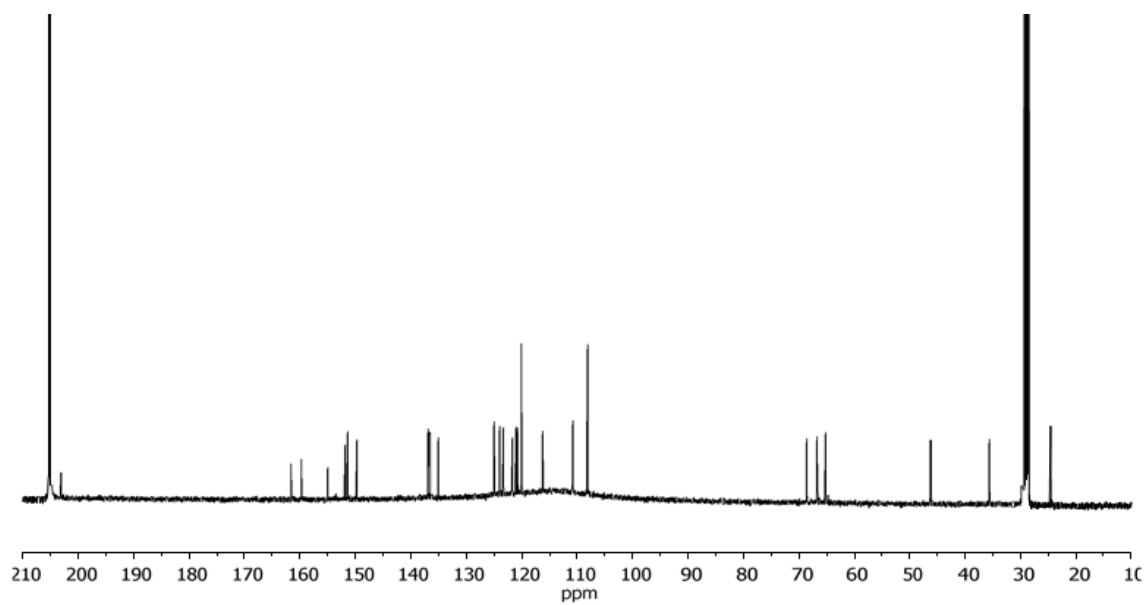

(c)

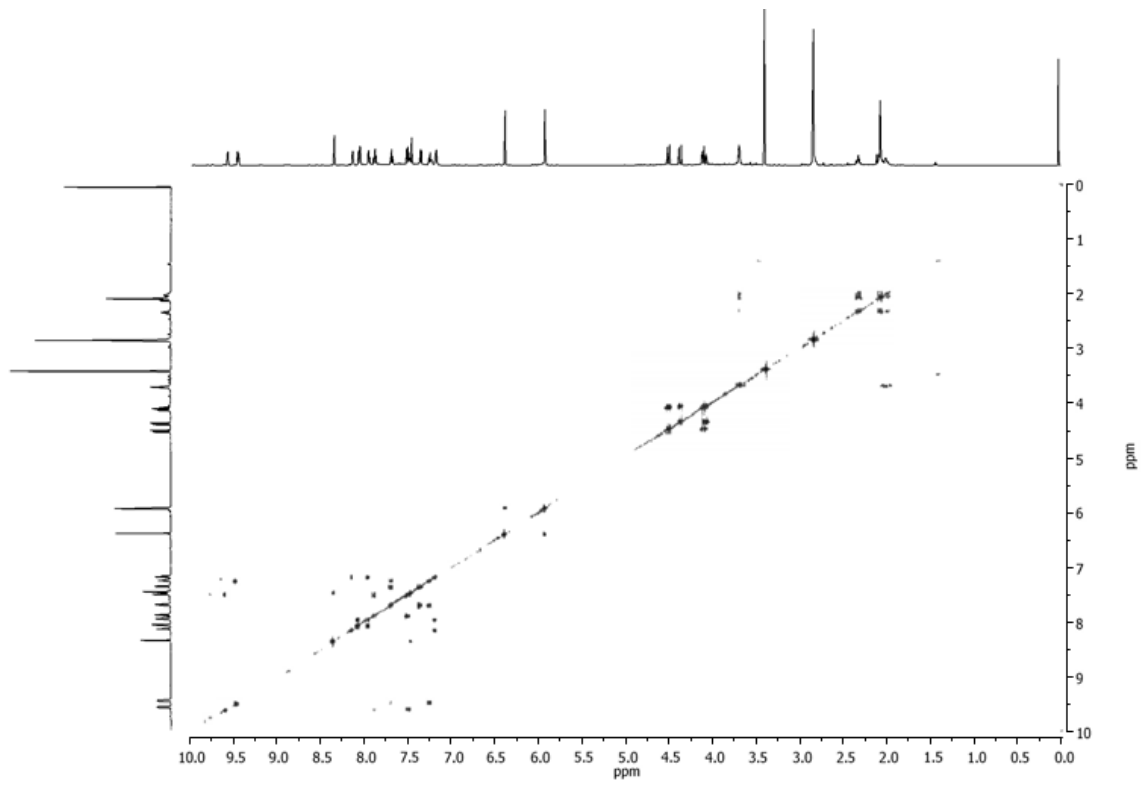

(d)

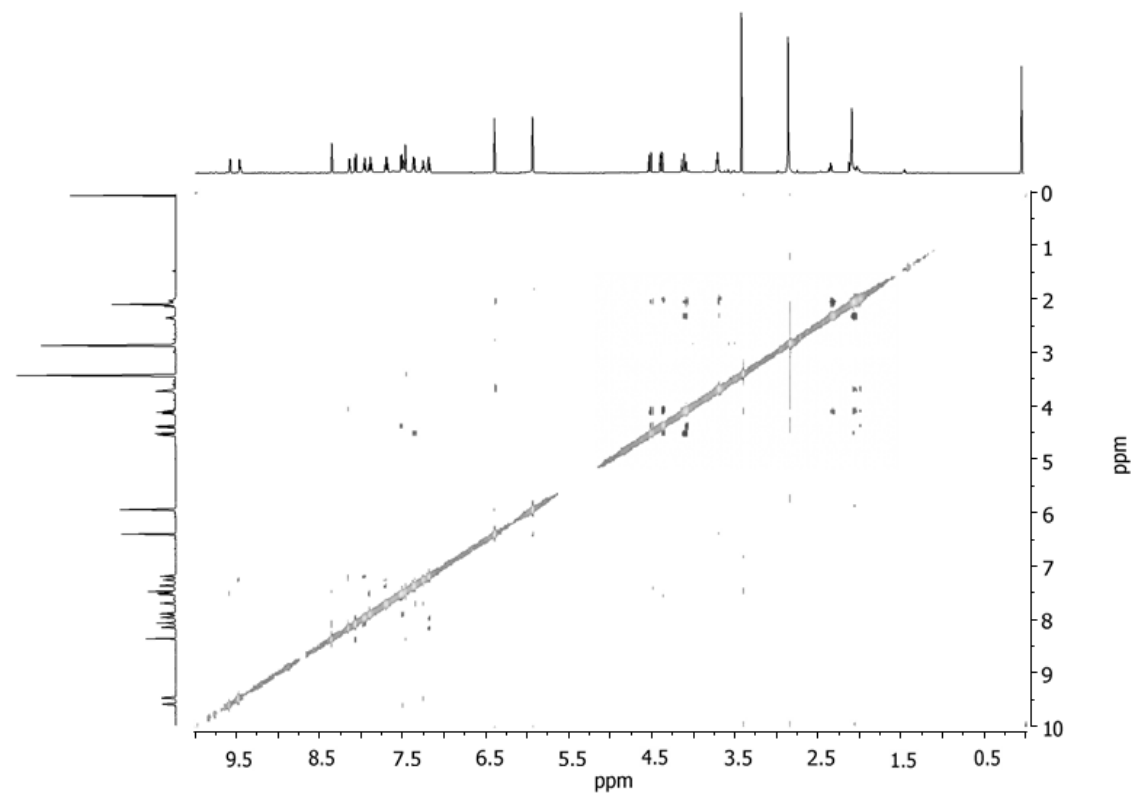

(e)

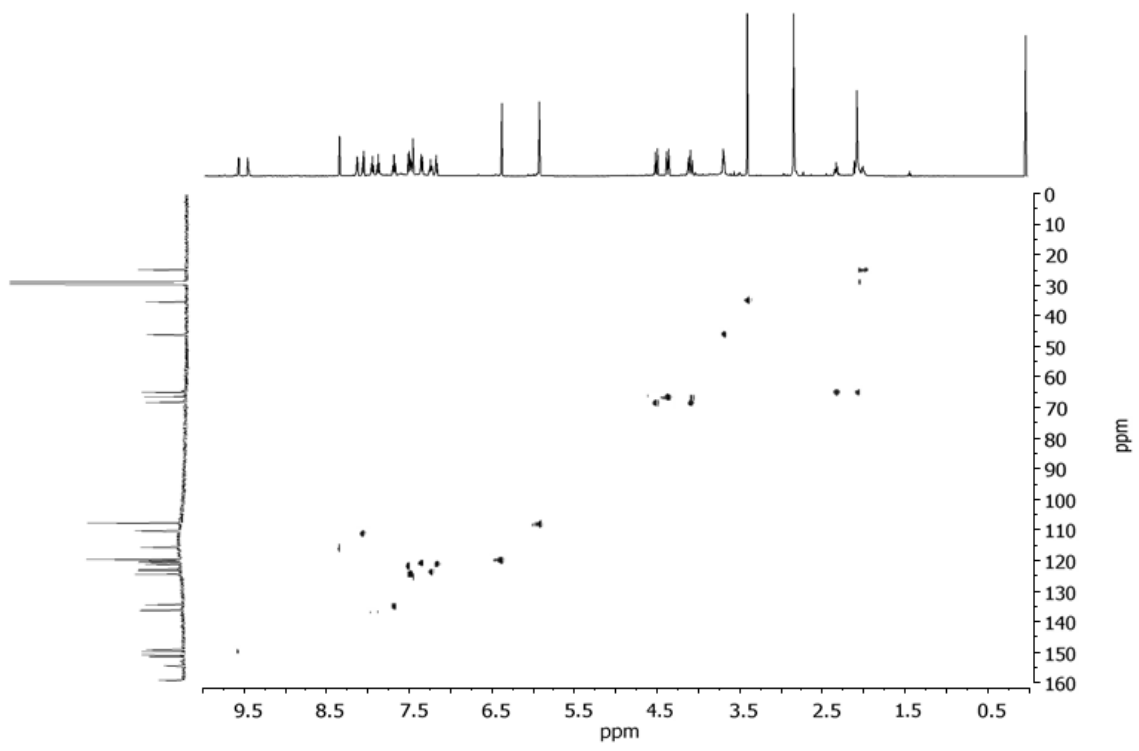

(f)

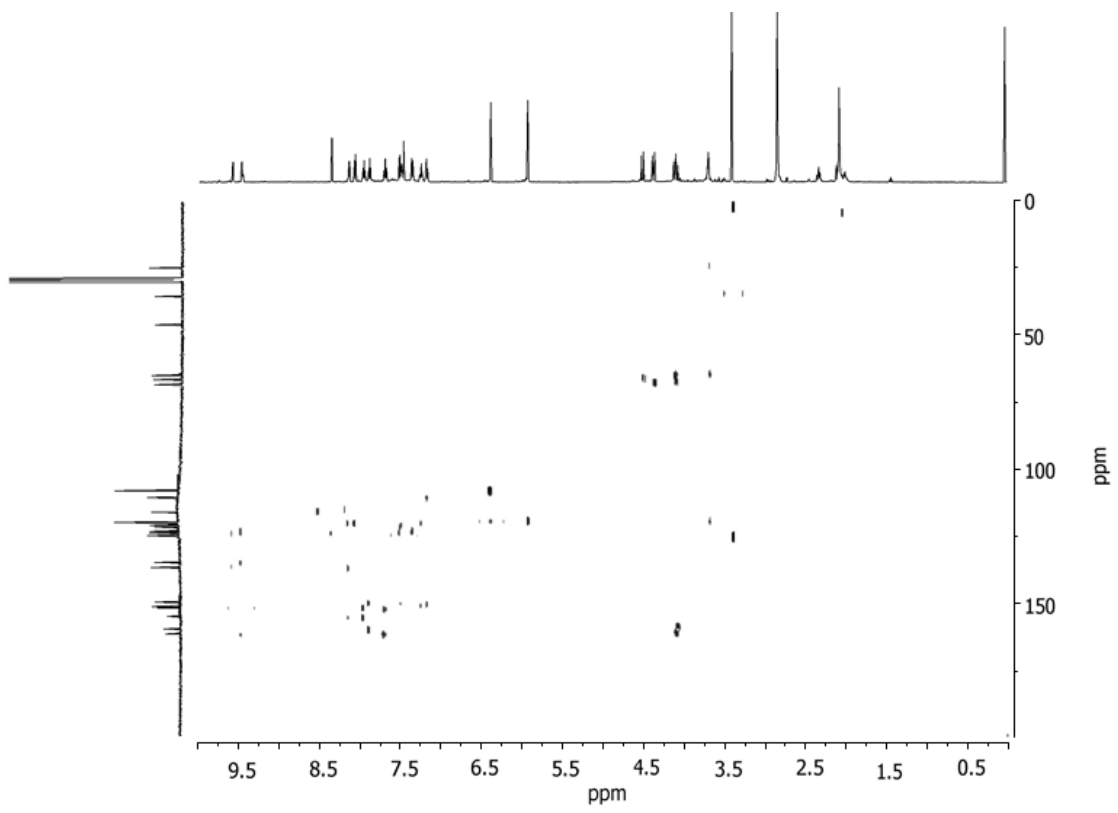

**Figure S 5.** NMR spectra (600 MHz, 298 K,  $d_6$ -acetone) *trans, fac*-[Ru<sup>II</sup>(CN-Me)(bpea-pyr)(H<sub>2</sub>O)]<sup>2+</sup>, **4**: (a) <sup>1</sup>H-NMR, (b) <sup>13</sup>C-NMR, (c) COSY, (d) NOESY, (e) HSQC, (f) HMBC.

(a)

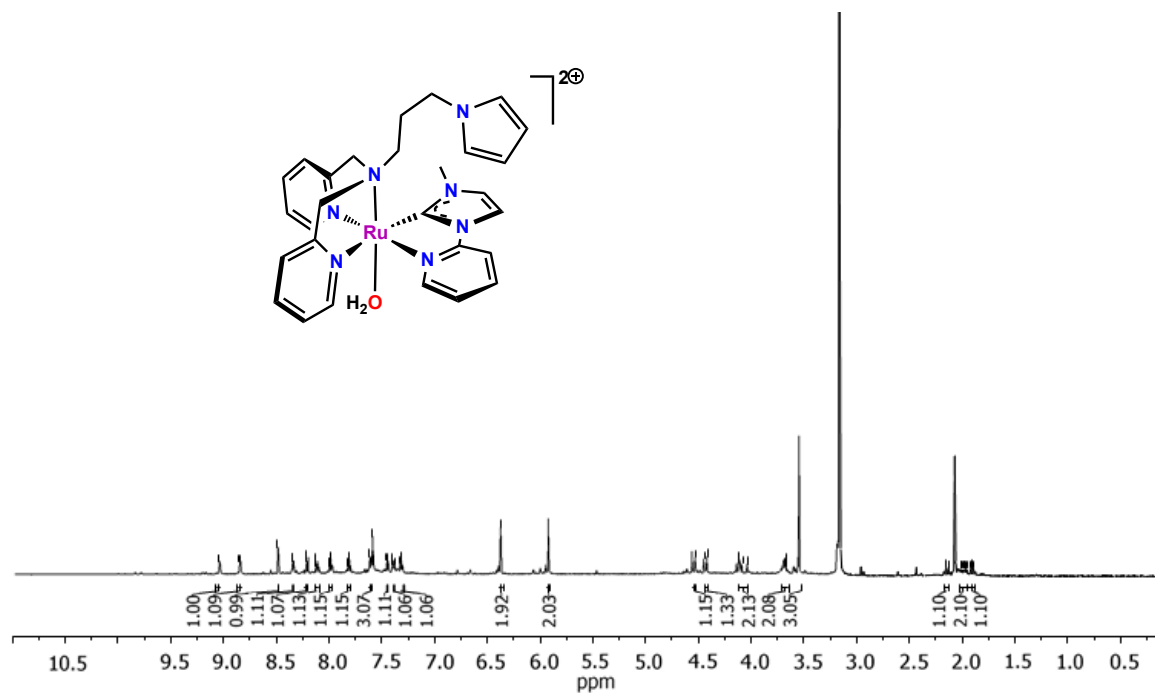

(b)

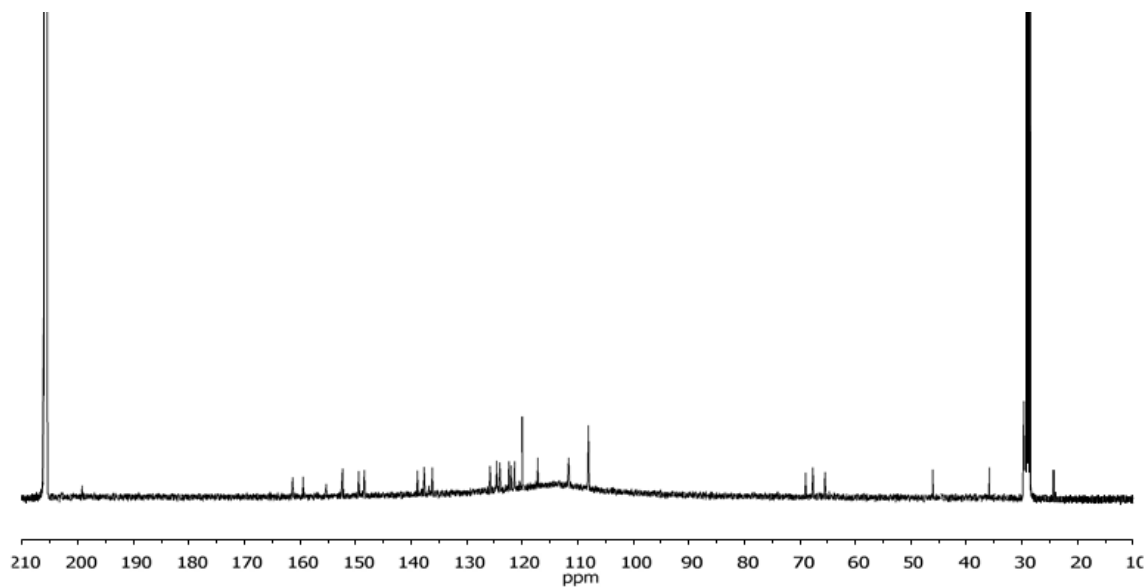

(c)

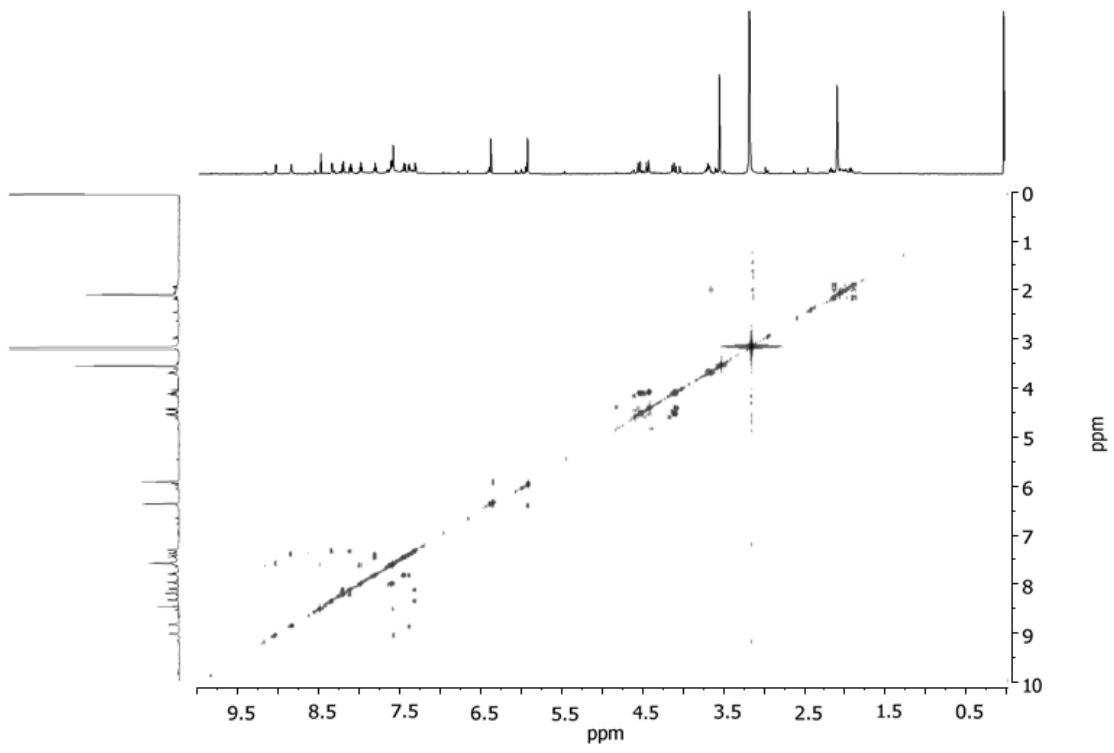

(d)

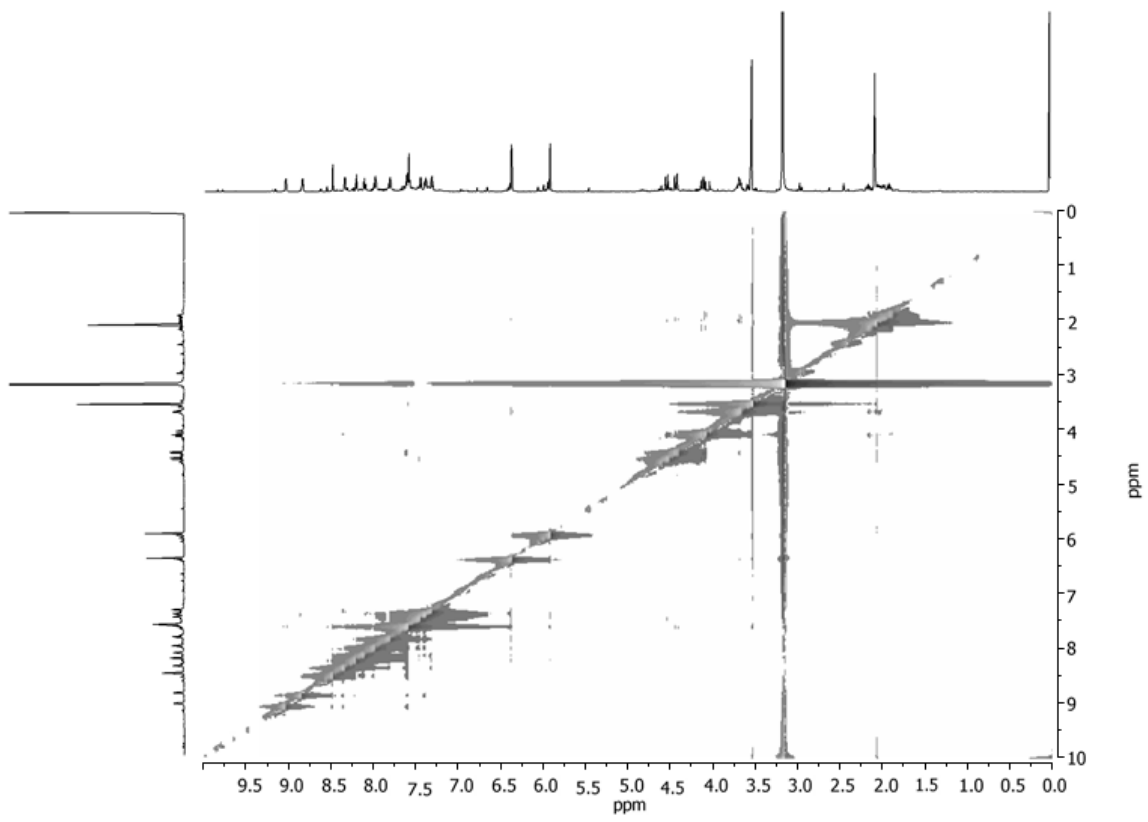

(e)

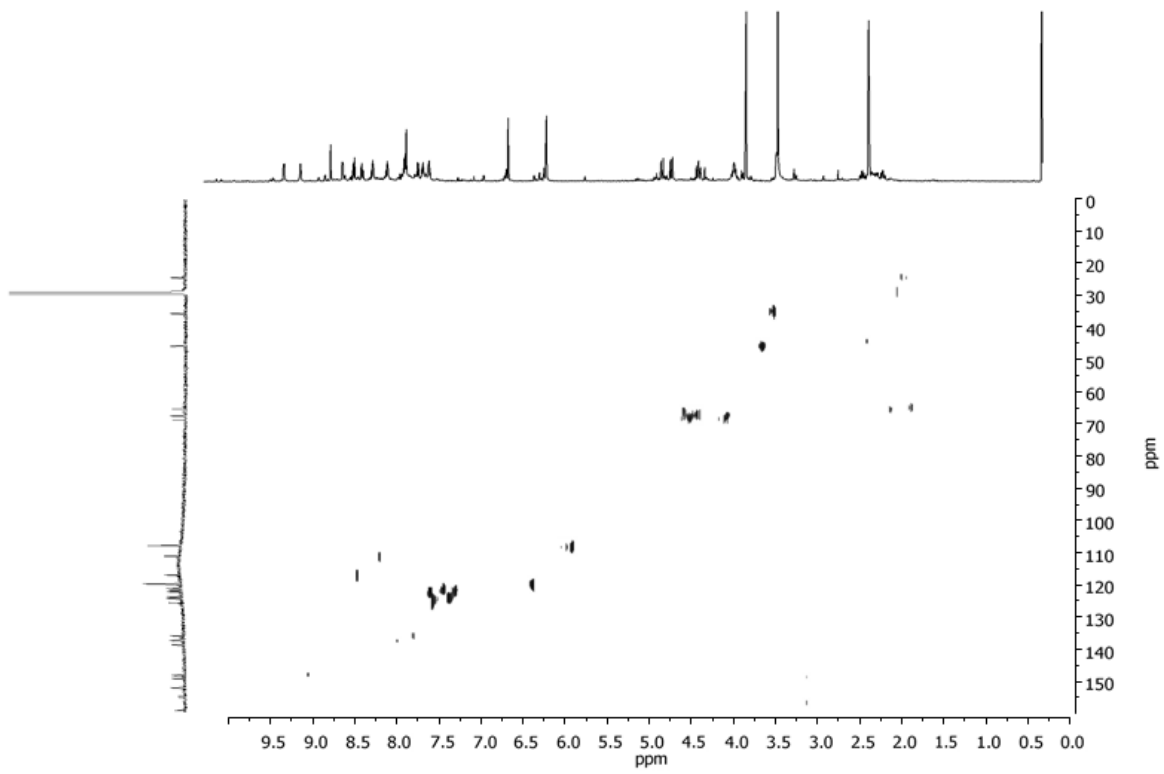

(f)

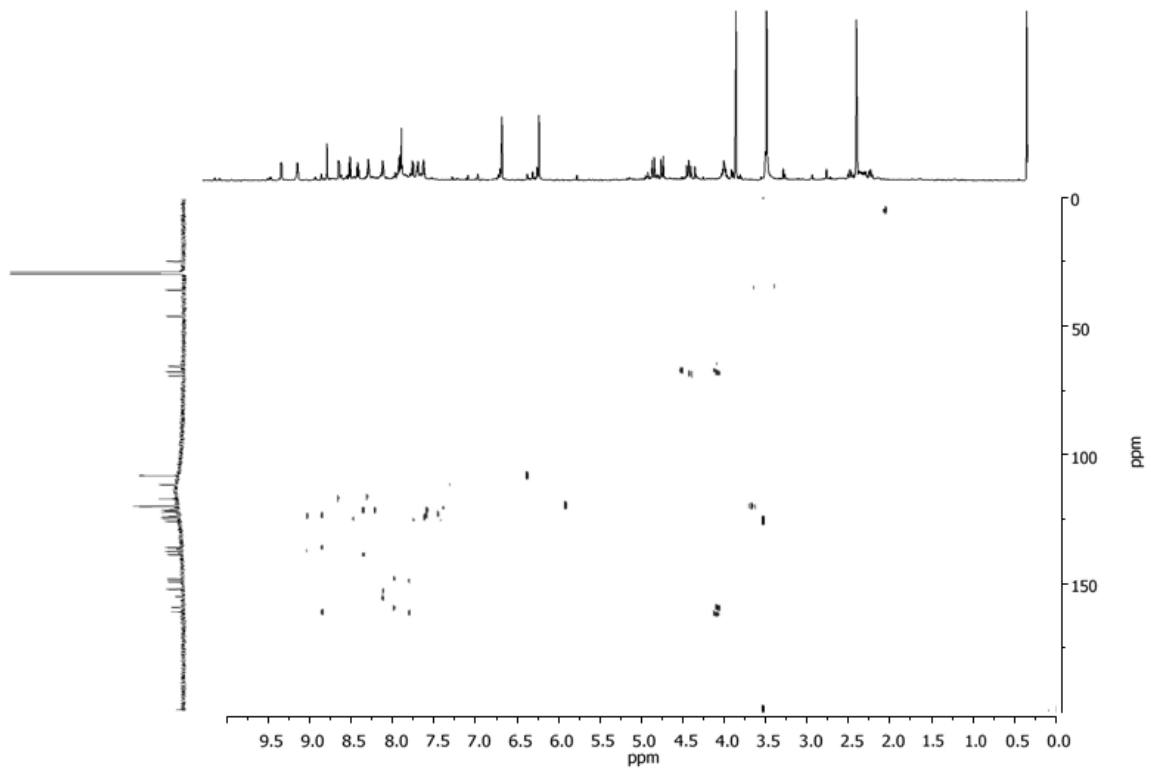

Figure S 6. Cyclic voltammogram of complex 3 (1 mM) registered in CH<sub>2</sub>Cl<sub>2</sub> + 0.1 M TBAH at a glassy carbon disk electrode (scan rate = 100 mV s<sup>-1</sup>).

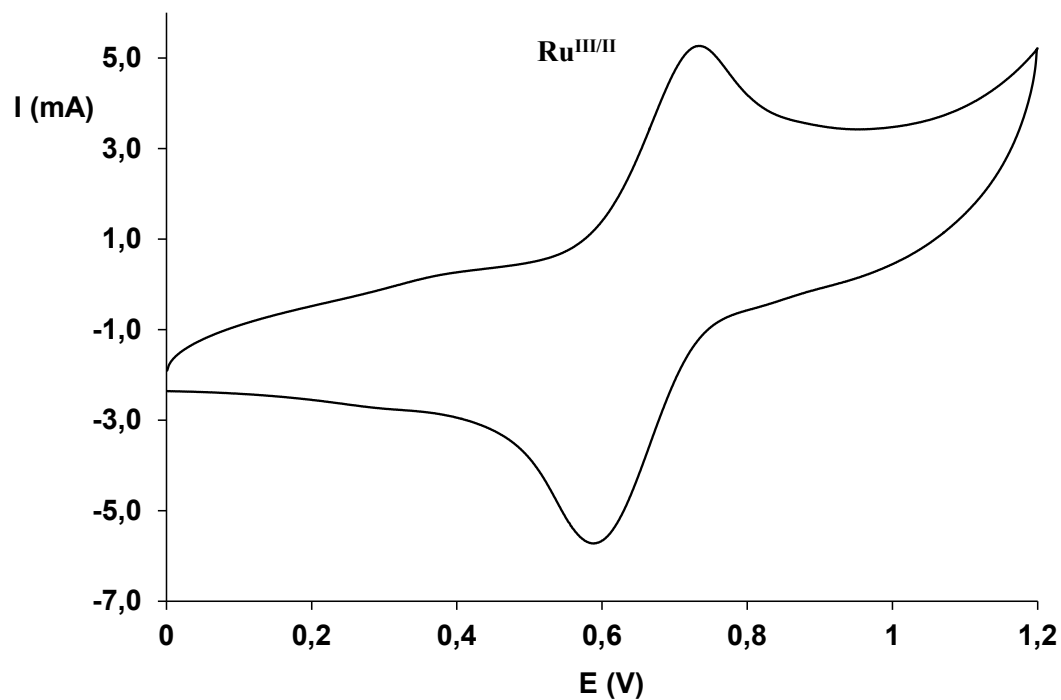

Figure S 7. Cyclic voltammogram of complex 4 (1 mM) in CH<sub>2</sub>Cl<sub>2</sub> + 0.1 M TBAH at a glassy carbon disk electrode (scan rate = 100 mV s<sup>-1</sup>).

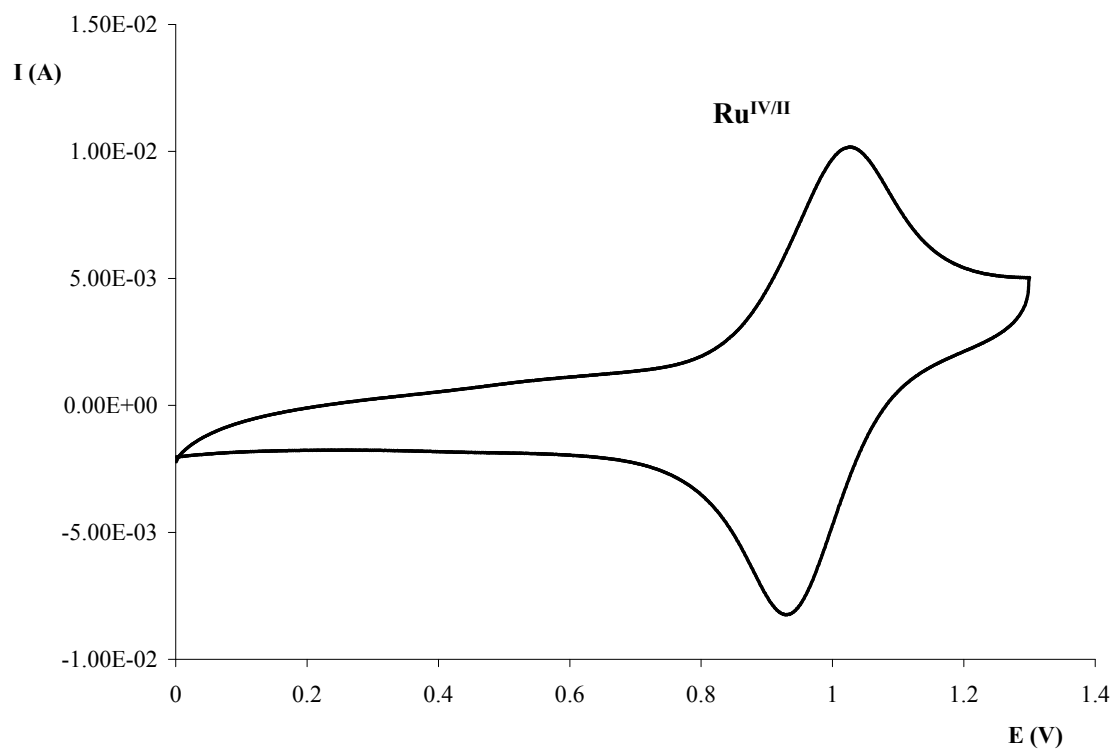



**Figure S 8.** (a) Growing of a **C/poly-3** film in  $\text{CH}_2\text{Cl}_2 + 0.1 \text{ M TBAH}$  at a glassy carbon disk electrode (diameter = 3 mm) by scanning the potential between 0 and 1.3 V throughout 30 cycles (scan rate =  $100 \text{ mV s}^{-1}$ ). (b) Cyclic voltammograms registered after transferring the **C/poly-3** modified electrode into a blank electrolyte solution (5 cycles were registered; final amount of anchored complex =  $4.36 \cdot 10^{-10} \text{ mols} \cdot \text{cm}^{-2}$ ).

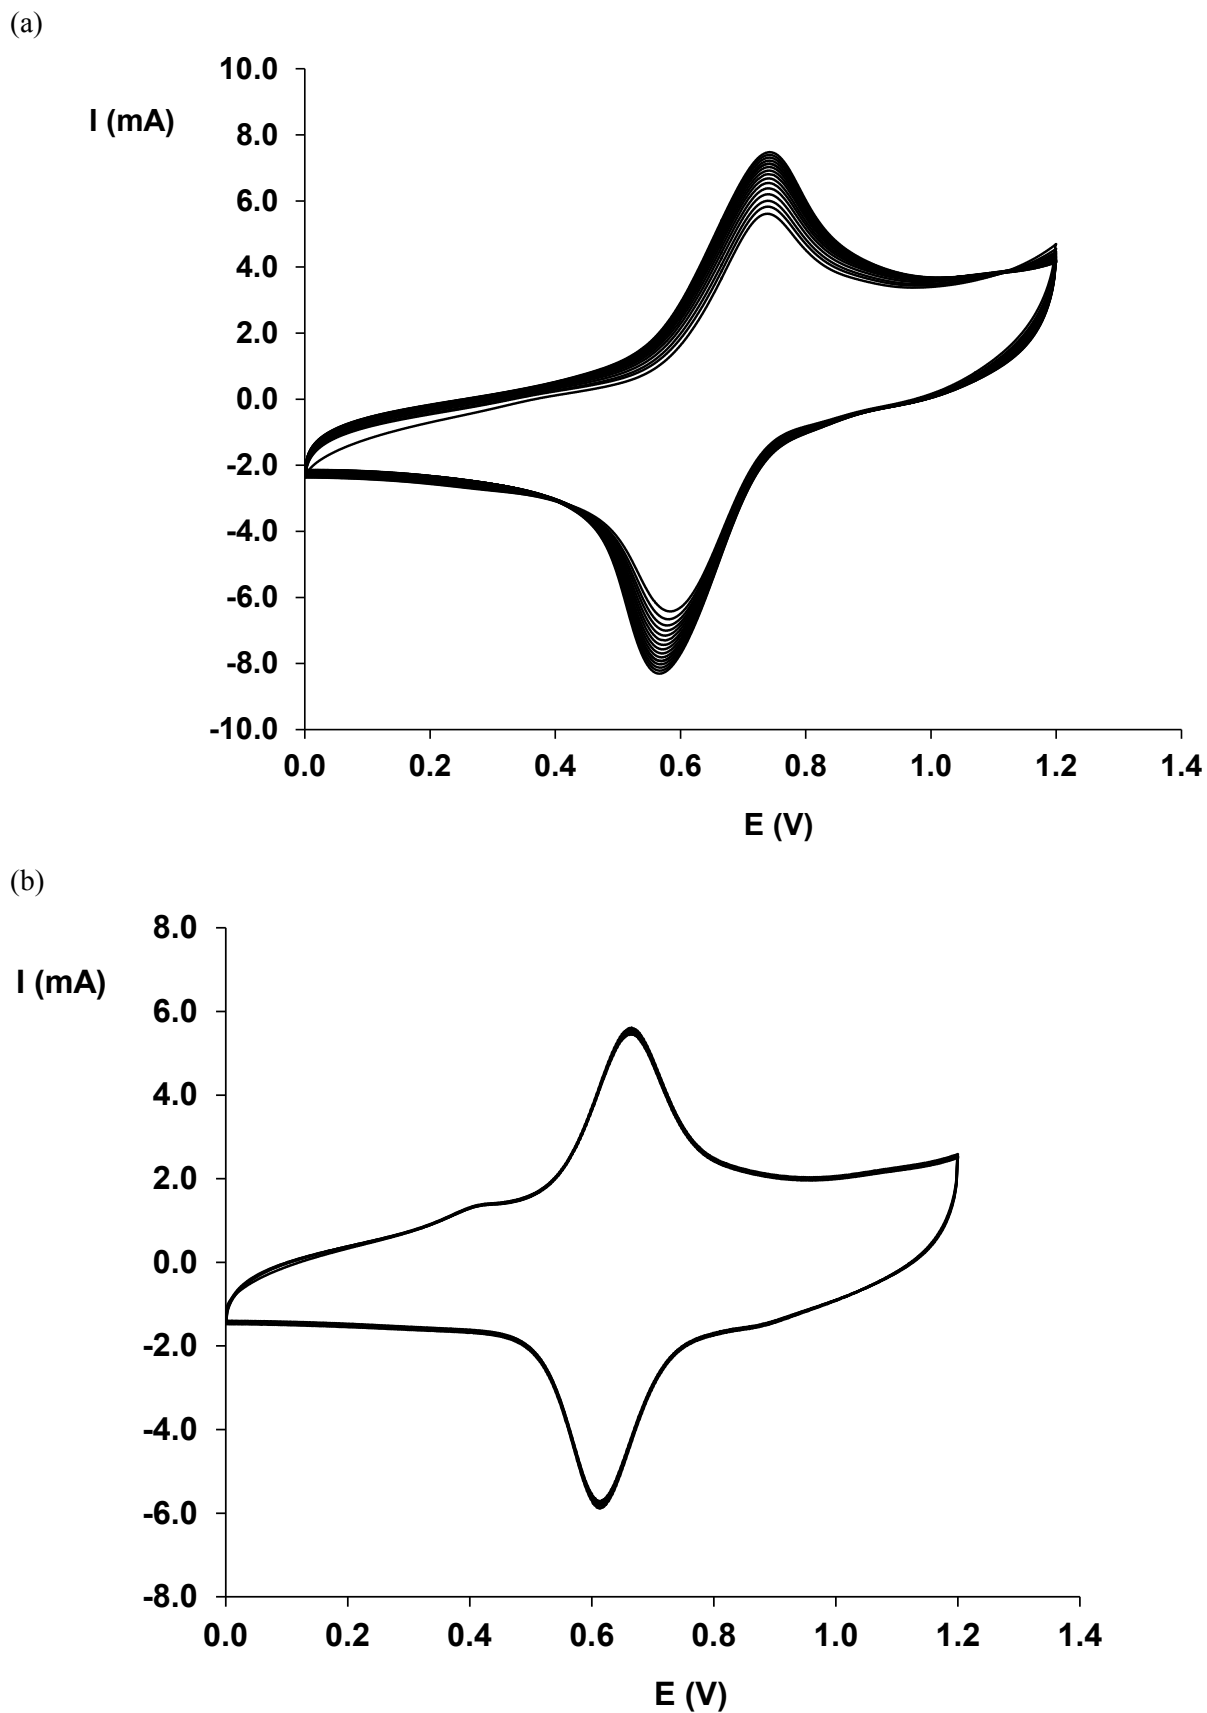

Figure S 9. Linear regression of  $E_{1/2}$  values vs. pH for the cyclic voltammograms of complex **4** registered in aqueous media.

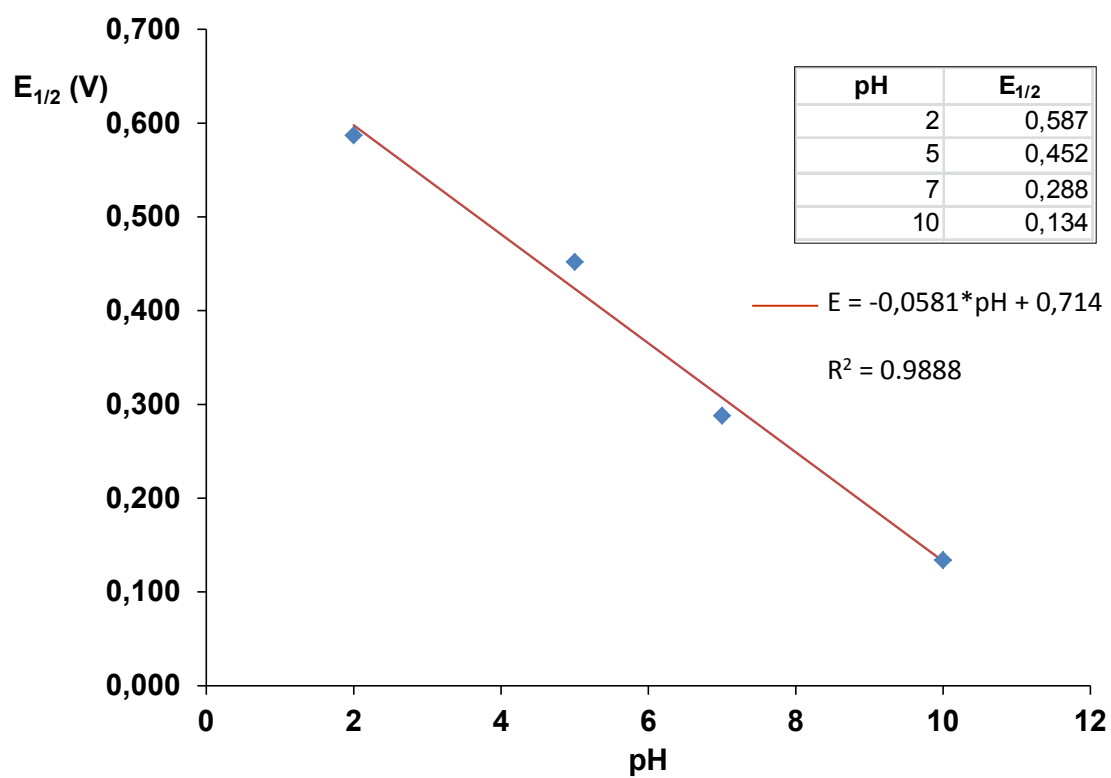

Supplement: c4dt00698d1.pdf [file c4dt00698d1.pdf]
